# Supplementary material for: In vivo reduction of RAD51‐mediated homologous recombination triggers aging but impairs oncogenesis
Source: PubMed Central journal article supplement — EMBO J. 2023 Sep 4;42(20):e110844. doi: 10.15252/embj.2022110844 (PMC10577633; doi:10.15252/embj.2022110844), 2023-09-04
Supplement: EMBJ-42-e110844-s002.pdf [file EMBJ-42-e110844-s002.pdf]

# Appendix

## Content:

|                           |         |
|---------------------------|---------|
| <b>Appendix Figure S1</b> | Page: 2 |
| <b>Appendix Figure S2</b> | Page: 4 |
| <b>Appendix Figure S3</b> | Page: 5 |
| <b>Appendix Table S1</b>  | Page: 6 |
| <b>Appendix Table S2</b>  | Page: 7 |
| <b>Appendix Table S3</b>  | Page: 8 |

**Additional material and methods:** Page: 9

**Appendix References:** Page: 11

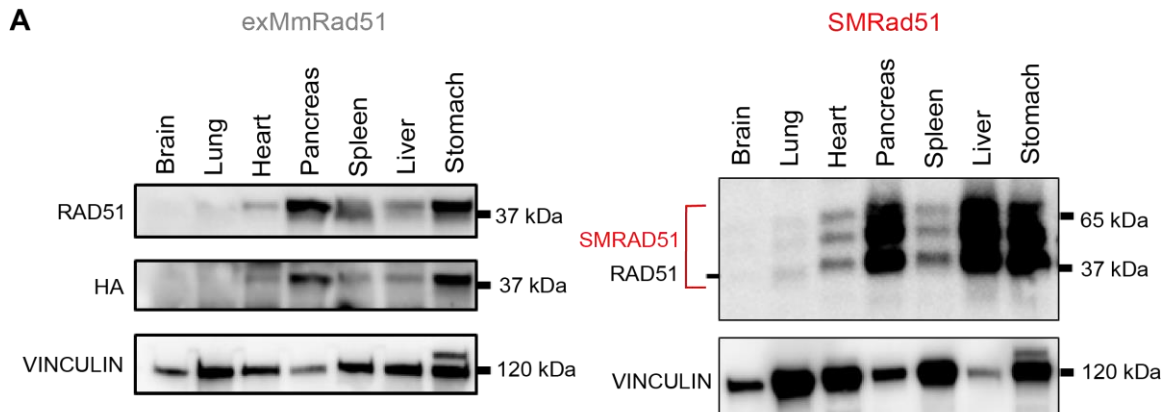

**B**

| Organ           | Phenotype                                                                | SMRAD51 expression |
|-----------------|--------------------------------------------------------------------------|--------------------|
| Pancreas        | Normal histology                                                         | Yes                |
| Heart           | Normal histology                                                         | Yes                |
| Lung            | Normal histology                                                         | Yes                |
| Liver           | Normal histology                                                         | Yes                |
| Spleen          | Normal histology                                                         | Yes                |
| Small intestine | Normal histology                                                         | Yes                |
| Testis          | Features of arrested development                                         | Yes                |
| Skin            | Few and abnormal hair follicles, acanthosis, numerous inflammatory cells | Yes                |

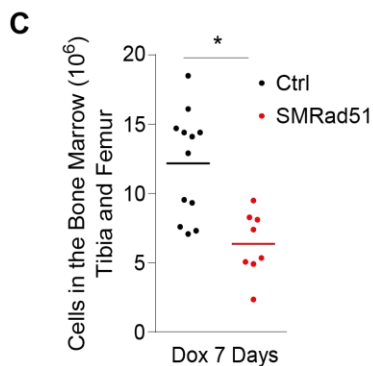

**Appendix Figure S1. Histopathological analysis of young growing mice after expression of *SMRad51* for 12 days. (A)** Western blot analysis of exMmRAD51 and SMRAD51 protein content in extracts from various tissues of young mice after 5 days of Dox treatment. **(B)** Summary of the results of pathological analysis and SMRAD51 presence assessment by immunohistochemistry in various tissues of SMRad51 and Ctrl mice. At least 3 different mice of each genotype were analyzed. **(C)** Cell numbers in tibia and femur bone marrow samples from young Ctrl and SMRad51 mice after 7 days of Dox

treatment. Each point represents a biological replicate and the horizontal bar show the mean. Statistical analysis: Student's t-test. \* $p < 0.05$ .

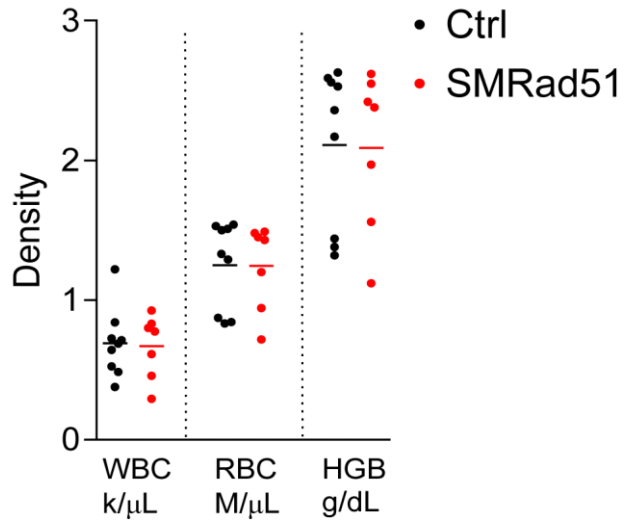

**Appendix Figure S2. *SMRad51* expression for 7 days does not change basic blood parameters.** WBC, RBC and HGB density analysis of blood samples from growing mice after 7 days of Dox treatment in Ctrl (n=9) and SMRad51 (n=7) mice. Each point represents a biological replicate and the horizontal bar show the mean.

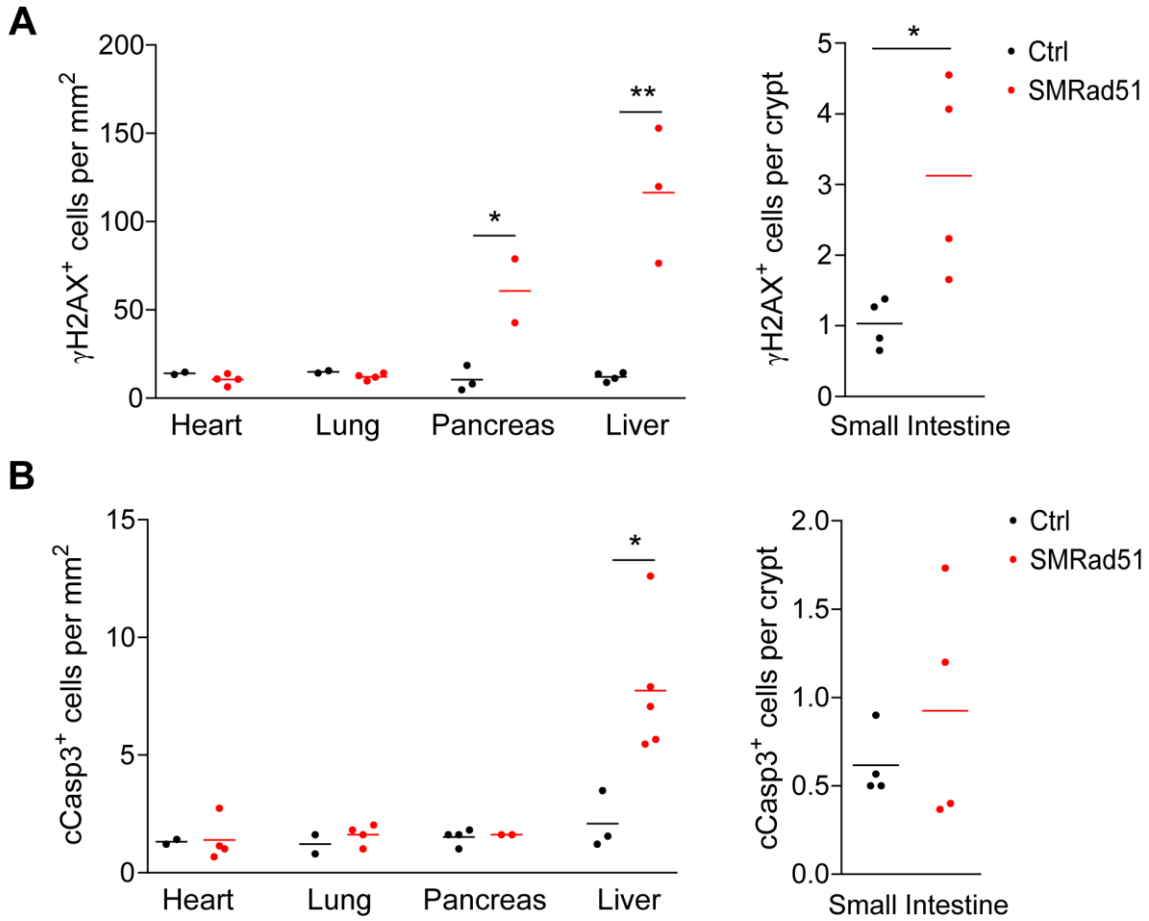

**Appendix Figure S3. *SMRad51* expression in growing mice leads to tissue-specific DDR activation and apoptosis.** **A.** Quantification of  $\gamma$ H2AX<sup>+</sup> cells in various tissues of Ctrl and SMRad51 mice after 12 days of Dox treatment. **B.** Quantification of cCasp3<sup>+</sup> positive cells in various tissues of Ctrl and SMRad51 mice after 12 days of Dox treatment. Each point represents a biological replicate and the horizontal bar show the mean. Statistical analysis: Student's t-test. \* p<0.05; \*\* p<0.01.

**Appendix Table S1.** Pre-mature ageing phenotypes compared to other models of DNA repair and/or progeroid syndrome

| Phenotype             | <i>ERCC1</i> <sup>-/-</sup><br>(Weeda <i>et al.</i> , 1997; Robinson <i>et al.</i> , 2018; Dollé <i>et al.</i> , 2011) | <i>XPD</i> <sup>TTD</sup><br>(De Boer <i>et al.</i> , 2002; Wijnhoven <i>et al.</i> , 2005) | <i>mTR</i> <sup>-/-</sup><br>(Rudolph <i>et al.</i> , 1999) | <i>ATR</i> <sup>S/S</sup><br>(Murga <i>et al.</i> , 2009; Ruzan <i>et al.</i> , 2007) | <i>BRCA1</i> <sup>Δ11</sup> <i>53BP1</i> <sup>S25A</sup><br>(Callen <i>et al.</i> , 2020) | SMRad51 | ExMmRad51 | <i>Lmna</i> <sup>HG/+</sup><br>(Yang <i>et al.</i> , 2008) |
|-----------------------|------------------------------------------------------------------------------------------------------------------------|---------------------------------------------------------------------------------------------|-------------------------------------------------------------|---------------------------------------------------------------------------------------|-------------------------------------------------------------------------------------------|---------|-----------|------------------------------------------------------------|
| Hair Loss             | -                                                                                                                      | +                                                                                           | +                                                           | +                                                                                     | na                                                                                        | +       | -         | na                                                         |
| Kyphosis              | +                                                                                                                      | +                                                                                           | +                                                           | +                                                                                     | +                                                                                         | +       | -         | +                                                          |
| Reduced Activity      | +                                                                                                                      | na                                                                                          | na                                                          | na                                                                                    | +                                                                                         | +       | -         | na                                                         |
| Priapism              | +                                                                                                                      | na                                                                                          | na                                                          | na                                                                                    | na                                                                                        | +       | -         | na                                                         |
| Decreased Body weight | +                                                                                                                      | +                                                                                           | +                                                           | +                                                                                     | +                                                                                         | +       | -         | +                                                          |
| Subcutaneous Fat Loss | +                                                                                                                      | +                                                                                           | +                                                           | na                                                                                    | na                                                                                        | +       | -         | +                                                          |

n/a = not available

**Appendix Table S2.** Classification of Cytokines and Chemokines presented in Figure 2  
(Turner et al. 2014 <http://dx.doi.org/10.1016/j.bbamcr.2014.05.014>)

| CYTOKINES                                                                                                                                                                                                                                                      | pro-inflammatory cytokines        | anti-inflammatory cytokines          | adaptive immunity cytokines            |
|----------------------------------------------------------------------------------------------------------------------------------------------------------------------------------------------------------------------------------------------------------------|-----------------------------------|--------------------------------------|----------------------------------------|
|                                                                                                                                                                                                                                                                | IL-1a<br>IL-1b<br>IL-1ra<br>INF-g | IL-23<br>IL-27<br>IL-28              | IL-3<br>IL-5<br>IL-2<br>IL-15<br>IL-13 |
| CHEMOKINES                                                                                                                                                                                                                                                     | angiostatic chemokines            | allergic pro-inflammatory chemokines | matrix remodeling                      |
|                                                                                                                                                                                                                                                                | CXCL11                            | CCL17                                | MMP-3<br>MMP-9                         |
| CXCL16= pro-inflammatory chemokine induced by IFN $\gamma$<br>CCL12= chemo-attracted chemokine (monocytes, eosinophils)<br>CCL20 or MIP3A (Macrophage Inflammatory Protein-3)= pro-inflammatory chemokine<br>CXCL13= chemo-attracted chemokine (lymphocytes B) |                                   |                                      |                                        |

**Appendix Table S3.** List of primers used for real time RT-PCR.

| <b>Gene Symbol</b> | <b>Forward primer 5' - 3'</b> | <b>Reverse primer 5' - 3'</b> |
|--------------------|-------------------------------|-------------------------------|
| <i>β-Actin</i>     | GCCCTGAGGCTCTTTT<br>CCAG      | TGCCACAGGATTCCATACCC          |
| <i>Gapdh</i>       | AGGTCGGTGTGAACG<br>GATTG      | TGTAGACCATGTAGTTGAGG<br>TCA   |
| <i>I16</i>         | TAGTCCTTCTACCCC<br>AATTTC     | TTGGTCCTTAGCCACTCCTT<br>C     |
| <i>Ccl2</i>        | TTAAAAACCTGGATCG<br>GAACCAA   | GCATTAGCTTCAGATTTACG<br>GGT   |
| <i>I11β</i>        | CAGGCAGGCAGTATCA<br>CTCA      | AGCTCATATGGGTCCGACAG          |
| <i>Tnfa</i>        | GAACTGGCAGAAGAG<br>GCACT      | AGGGTCTGGGCCATAGAACT          |
| <i>Cxcl1</i>       | CTGGGATTCACCTCAA<br>GAACATC   | CAGGGTCAAGGCAAGCCTC           |



## Appendix material and methods

### **Colony formation assay**

For a colony formation assay, one hundred exMmRad51 or SMRad51 iMEFs were plated per well in 6-well plates. After 24 h, the cells were treated or not treated with 10 µg/mL doxycycline, and 24 h later, the cells were treated or not with mitomycin C (MMC; Roche #10107409001) or olaparib (Selleckchem #S1060) for 10 days. The drugs were added only once at the start of the treatment. The clones were stained with crystal violet and counted.

### **Homology-dependent gene targeting assay**

The gene targeting procedure was derived from (Zhang *et al*, 2014). This protocol consists of replacing the second exon of the 53BP1 gene with a hygromycin resistance (Hyg<sup>+</sup>) gene using a homology-dependent donor plasmid (here called pDonor) after Cas9-mediated production of a DNA DSB. A total of 300,000 cells were resuspended in 100 µL of nucleofection buffer (Lonza #VCA-1003) containing 1 µg of pCas9 and 2 µg of pDonor with or without 1 µg of pgRNA1 or pgRNA2. The cells were nucleofected using Amaxa (Lonza) protocol T30. Immediately after nucleofection, 500 µL of medium was added, and the cells were plated on a 10 mm petri dish. After 48 h, the targeted clones (Hyg<sup>+</sup>) were selected for 10 days with medium containing hygromycin that was renewed every 48 h. The clones were stained with crystal violet and counted.

### **Protein purification**

Previously generated pcDNA3.1-MmRad51 and pcDNA3.1-SMRad51 constructs (Lambert & Lopez, 2000) encoding sequences were subcloned into a pCDF-His-SUMO backbone using a complementary single-strand annealing-based method. His-SUMO-MmRAD51 and his-SUMO-SMRAD51 were both expressed in the *E. coli* strain BRL(DE3)pLysS. All of the protein purification steps were carried out at 4°C. Protein expression was induced in 3 L of cell culture medium with 0.5 mM isopropyl-1-thio-β-D-galactopyranoside overnight at 20°C, after which the cells were resuspended in PBS with 350 mM NaCl, 20 mM imidazole, 10% glycerol, 0.5 mg/mL lysozyme, complete protease inhibitor (Roche), and 1 mM 4-(2-aminoethyl)benzenesulfonyl fluoride (AEBSF). Then, the cells were lysed by sonication, and the insoluble material was removed by centrifugation at 150,000 × *g* for 1 h. The supernatant was incubated with 5 mL of Ni-NTA resin (Qiagen) for 2 h. The mixture was poured into an Econo-Column Chromatography Column (Bio-Rad), and the beads were washed with 80 mL of W1 buffer (20 mM Tris HCl pH 8, 500 mM NaCl, 20 mM imidazole, 10% glycerol, 0.5% NP40) followed by 80 mL of W2 buffer (20 mM Tris HCl pH 8, 100 mM NaCl, 20 mM imidazole, 10% glycerol, 1 mM DTT). His-SUMO-tagged proteins bound to the beads were then resuspended in 8 mL of W2 buffer and incubated with SUMO protease at a ratio of 1/80 (w/w) for 16 h. The proteins in which the His-SUMO tag was cleaved were then recovered in the flowthrough and directly loaded onto a HiTrap heparin column (GE Healthcare). The column was washed with W2 buffer, and then a 0.1-1 M NaCl gradient was applied. Fractions containing purified proteins were dialyzed against storage buffer (20 mM Tris HCl pH 8, 50 mM KCl, 0.5 mM EDTA, 10% glycerol, 1 mM DTT, 0.5 mM AEBSF), aliquoted and stored at -80°C. The concentrations of purified MmRad51 and SMRad51 were calculated using extinction coefficients of  $1.664 \times 10^4 \text{ M}^{-1}\text{cm}^{-1}$  and  $1.813 \times 10^4 \text{ M}^{-1}\text{cm}^{-1}$  at 280 nm, respectively.

### **D-Loop assay**

For the D-loop assay, 19 nM molecules (7.5 µM nt) of a 400 nucleotides ssDNA labeled with the Cy5 fluorophore were incubated with MmRAD51, SMRAD51 or both (SM:MmRAD51 ratio: 0, 8, 16, 24, 32, 48 and 100%) at a final concentration of 25 µM (1 protein per 3 nt) for 3 minutes at 37°C. RPA was then added to a final concentration of 0.075 µM (1 protein per 100 nt) over a span of 15 minutes in buffer containing 10 mM Tris-HCl (pH 8), 50 mM sodium chloride, 2 mM calcium chloride, 2 mM Magnesium

chloride, 1 mM DTT and 1.5 mM ATP. Then, a homologous double-stranded DNA (dsDNA) pUC19 plasmid (purchased from New England Biolabs) was added to the reaction at a concentration of 16 nM molecules in a final volume of 8  $\mu$ L over a span of 30 minutes. The total reaction was stopped by the addition of 1% SDS (w/v) plus 25 mM EDTA and deproteinized (by 30 minutes of incubation at 37°C with 2 mg/mL proteinase K). The samples were run in a 1.2 % (w/v) agarose gel at 80 V for 35 minutes in 0.5x TAE buffer. Fluorolabeled DNA species were visualized by using a Typhoon FLA 9500 (GE Healthcare Life Sciences).

#### **TEM analysis of RAD51 filaments**

RAD51 presynaptic filaments were assembled on a 5' DNA junction with a single-stranded overhang (the construction of which has been described in (Tavares *et al*, 2019) using MmRAD51, SMRAD51 or a mix of both, as follows: 0.2  $\mu$ M (36  $\mu$ M nt) of 5' junction DNA molecules were incubated with MmRAD51, SMRAD51 or both at a final concentration of 12  $\mu$ M (1 protein per 3 nt) for 5 minutes at 37°C. RPA was then added to a final concentration of 0.6  $\mu$ M (1 protein per 100 nt) over a span of 10 minutes in buffer containing 10 mM Tris-HCl (pH 8), 50 mM sodium chloride, 2 mM calcium chloride, 1 mM DTT and 1.5 mM ATP. The reactions were quickly diluted 25x in buffer, and a 5  $\mu$ L drop was deposited on a 600-mesh copper grid previously covered with a thin carbon film and activated with pentylamine by glow discharge using a Dubochet device. Each grid was rinsed, positively stained with aqueous 2% (w/v) uranyl acetate, dried carefully with filter paper and observed in annular dark-field mode using a Zeiss 902 transmission electron microscope. Images were captured at a magnification of 85,000x with a MegaViewIII charge-coupled device (CCD) camera and analyzed with iTEM software (Olympus Soft Imaging Solution).

#### **Western blotting.**

Cells were lysed in buffer containing 20 mM Tris HCl (pH 7.5), 1 mM Na<sub>2</sub>EDTA, 1 mM EGTA, 150 mM NaCl, 1% (w/v), 1 mM  $\beta$ -glycerophosphate, NP40, 1% sodium deoxycholate, 2.5 sodium pyrophosphate, 1 mM NA<sub>3</sub>VO<sub>4</sub>, 1  $\mu$ g/ml leupeptin and complete ULTRA Tablets (Roche, Basel, Switzerland). Denatured proteins (20-40  $\mu$ g) were electrophoresed in 9% SDS-PAGE gels or MiniPROTEAN® TGX™ 4-15% Precast gels (Bio-Rad, Hercules, CA, USA) transferred onto a nitrocellulose membrane and probed with specific antibodies. Anti-Vinculin (1/8,000, SPM227, ab18058, Abcam, Cambridge, UK), anti-RAD51 (1/1,000, Ab-1, PC130, Millipore, Burlington, MS, USA). Immunoreactivity was visualized through an enhanced chemiluminescence detection kit (ECL, Pierce).

#### **Measurement of SSA and EJ efficiency by FACS.**

Cells were transfected with the pCBAScel plasmid (Addgene, Watertown, MA, USA, #26477) and incubated for 72 hours. Then cells were collected with 50 mM EDTA diluted in PBS, pelleted and fixed with 2% paraformaldehyde for 20 minutes. The percentage of GFP-expressing cells was scored by FACS analysis using a BD Accuri C6 flow cytometer (BD, Franklin Lakes, NJ, USA). The percentage of CD4-expressing cells was measured after incubation for 10 minutes with 1  $\mu$ L of anti-CD4 antibody coupled to Alexa 647 (rat isotype, RM4-5, Invitrogen, Waltham, MA, USA).

## Appendix References

- Callen E, Zong D, Wu W, Wong N, Stanlie A, Ishikawa M, Pavani R, Dumitrache LC, Byrum AK, Mendez-Dorantes C, Martinez P, Canela A, Maman Y, Day A, Kruhlak MJ, Blasco MA, Stark JM, Mosammaparast N, McKinnon PJ & Nussenzweig A (2020) 53BP1 Enforces Distinct Pre- and Post-resection Blocks on Homologous Recombination. *Mol. Cell* **77**: 26-38.e7
- De Boer J, Andressoo JO, De Wit J, Huijman J, Beems RB, Van Steeg H, Weeda G, Van der Horst GTJ, Van Leeuwen W, Themmen APN, Meradji M & Hoeijmakers JHJ (2002) Premature aging in mice deficient in DNA repair and transcription. *Science* (80-. ). **296**: 1276–1279
- Dollé MET, Kuiper R V., Roodbergen M, Robinson J, de Vlugt S, Wijnhoven SWP, Beems RB, de la Fonteyne L, de With P, van der Pluijm I, Niedernhofer LJ, Hasty P, Vijg J, Hoeijmakers JHJ & van Steeg H (2011) Broad segmental progeroid changes in short-lived *Ercc1*  $-/\Delta 7$  mice. *Pathobiol. Aging Age-related Dis.* **1**: 7219
- Gelot C, Guirouilh-Barbat J, Le Guen T, Dardillac E, Chailleux C, Canitrot Y & Lopez BSBS (2016) The Cohesin Complex Prevents the End Joining of Distant DNA Double-Strand Ends. *Mol. Cell* **61**: 15–26
- Guirouilh-Barbat J, Huck S, Bertrand P, Pirzio L, Desmaze C, Sabatier L & Lopez BSBS (2004) Impact of the KU80 pathway on NHEJ-induced genome rearrangements in mammalian cells. *Mol. Cell* **14**: 611–623
- Guirouilh-Barbat J, Rass E, Plo I, Bertrand P & Lopez BSBS (2007) Defects in XRCC4 and KU80 differentially affect the joining of distal nonhomologous ends. *Proc. Natl. Acad. Sci. U. S. A.* **104**: 20902–20907 Available at: [http://www.ncbi.nlm.nih.gov/entrez/query.fcgi?cmd=Retrieve&db=PubMed&dopt=Citation&list\\_uids=18093953](http://www.ncbi.nlm.nih.gov/entrez/query.fcgi?cmd=Retrieve&db=PubMed&dopt=Citation&list_uids=18093953)
- Gunn A & Stark JM (2012) I-SceI-based assays to examine distinct repair outcomes of mammalian chromosomal double strand breaks. *Methods Mol. Biol.* **920**: 379–391
- Lambert S & Lopez BS (2000) Characterization of mammalian RAD51 double strand break repair using non lethal dominant negative forms. *EMBO J.* **19**: 3090–3099
- Lambert S & Lopez BS (2001) Role of RAD51 in sister-chromatid exchanges in mammalian cells. *Oncogene* **20**: 6627-6631.
- Murga M, Bunting S, Montãa MF, Soria R, Mulero F, Cãamero M, Lee Y, McKinnon PJ, Nussenzweig A & Fernandez-Capetillo O (2009) A mouse model of ATR-Seckel shows embryonic replicative stress and accelerated aging. *Nat. Genet.*
- Rass E, Grabarz A, Plo I, Gautier J, Bertrand P & Lopez BSBS (2009) Role of Mre11 in chromosomal nonhomologous end joining in mammalian cells. *Nat Struct Mol Biol* **16**: 819–824 Available at: <http://www.ncbi.nlm.nih.gov/pmc/articles/PMC2748441/>
- Robinson AR, Yousefzadeh MJ, Rozgaja TA, Wang J, Li X, Tilstra JS, Feldman CH, Gregg SQ, Johnson CH, Skoda EM, Frantz MC, Bell-Temin H, Pope-Varsalona H, Gurkar AU, Nasto LA, Robinson RAS, Fuhrmann-Stroissnigg H, Czerwinska J, McGowan SJ, Cantu-Medellin N, et al (2018) Spontaneous DNA damage to the nuclear genome promotes senescence, redox imbalance and aging. *Redox Biol.* **17**: 259–273
- Rudolph KL, Chang S, Lee HW, Blasco M, Gottlieb GJ, Greider C & DePinho RA (1999) Longevity, stress response, and cancer in aging telomerase-deficient mice. *Cell* **96**: 701–712
- Ruzankina Y, Pinzon-Guzman C, Asare A, Ong T, Pontano L, Cotsarelis G, Zediak VP, Velez M, Bhandoola A & Brown EJ. (2007) Deletion of the Developmentally Essential Gene ATR in Adult Mice Leads to Age-Related Phenotypes and Stem Cell Loss. *Cell Stem Cell* **1**: 113-126.
- Saintigny Y, Delacote F, Vares G, Petitot F, Lambert S, Auerbeck D & Lopez BS (2001)

- Characterization of homologous recombination induced by replication inhibition in mammalian cells. *EMBO J* **20**: 3861-3870.
- So,A., Dardillac,E., Muhammad,A., Chailleux,C., Sesma-Sanz,L., Ragu,S., Le Cam,E., Canitrot,Y., Masson,J.Y., Dupaigne,P., Lopez,B.S. and Guirouilh-Barbat,J. (2022) RAD51 protects against nonconservative DNA double-strand break repair through a nonenzymatic function. *Nucleic Acids Res* **50**: 2651-2666.
- Tavares EM, Wright WD, Heyer WD, Le Cam E & Dupaigne P (2019) In vitro role of Rad54 in Rad51-ssDNA filament-dependent homology search and synaptic complexes formation. *Nat. Commun.* **10**:
- Weeda G, Donker I, De Wit J, Morreau H, Janssens R, Vissers CJ, Nigg A, Van Steeg H, Bootsma D & Hoeijmakers JHJ (1997) Disruption of mouse ERCC1 results in a novel repair syndrome with growth failure, nuclear abnormalities and senescence. *Curr. Biol.* **7**: 427–439
- Wijnhoven SWP, Beems RB, Roodbergen M, Van Den Berg J, Lohman PHM, Diderich K, Van Der Horst GTJ, Vijg J, Hoeijmakers JHJ & Van Steeg H (2005) Accelerated aging pathology in ad libitum fed XpdTTD mice is accompanied by features suggestive of caloric restriction. *DNA Repair (Amst)*. **4**: 1314–1324
- Wilhelm T, Magdalou I, Barascu A, Techer H, Debatisse M & Lopez BSBS (2014) Spontaneous slow replication fork progression elicits mitosis alterations in homologous recombination-deficient mammalian cells. *Proc. Natl. Acad. Sci. U. S. A.* **111**: 763–768
- Yang SH, Andres DA, Spielmann HP, Young SG & Fong LG (2008) Progerin elicits disease phenotypes of progeria in mice whether or not it is farnesylated. *J. Clin. Invest.* **118**: 3291–3300
- Zhang Y, Vanoli F, LaRocque JR, Krawczyk PM & Jasin M (2014) Biallelic targeting of expressed genes in mouse embryonic stem cells using the Cas9 system. *Methods* **69**: 171–178
